# Supplementary material for: Solution and solid-state studies of 3,4-dichloro-2,5-diamidopyrroles: formation of an unusual anionic narcissistic dimerElectronic supplementary information (ESI) available: synthesis and characterisation of compounds 3 and 4. See http://www.rsc.org/suppdata/cc/b2/b200980c/
Source: Royal Society of Chemistry journal article supplement (doi:10.1039/b200980c), 2002-03-12
Supplement: b200980c.doc [file b200980c.doc]

# Supplementary data

**Solution and solid-state studies of 3,4-dichloro-2,5-diamidopyrroles: formation of an unusual anionic narcissistic dimer**

Salvatore Camiolo, Philip A. Gale,* Michael B. Hursthouse, Mark E. Lightand Andy J. Shi

Department of Chemistry, University of Southampton, Southampton, UK, SO17 1BJ. Fax: +44 23 80596805; Tel+44 23 80593332; E-mail: [philip.gale@soton.ac.uk](mailto:philip.gale@soton.ac.uk)

Synthesis

Compound **3**. 3,4-Dichloro-1*H*-pyrrole-2,5-dicarboxylic acid bis-phenylamide: Aniline (0.65mL, 7mmol) was dissolved in dry dichloromethane (20mL) and trimethylaluminium (2M hexane solution, 3.5mL, 7mmol) was added dropwise. 3,4-Dichloro-1*H*-pyrrole-2,5-dicarboxylic acid diethyl ester (1g, 3.57mmol) was added to the resulting yellow solution and the mixture refluxed for 5 days. After cooling, the solution was neutralized with HCl 2M until effervescence ceased. The phases were separated and the aqueous layer washed with dichloromethane (30mL). The organic fractions were combined and the solvent removed under vacuum. The brown residue was purified by crystallization with acetonitrile (20mL). Yield: 150mg, 11%. 1H NMR in CDCl3  (ppm): 7.20 (t, *J* = 7.29, 2H, Ar.), 7.38 (m, 4H, Ar.), 7.62 (d, *J* = 8.19, 4H, Ar.) 8.49 (s, 2H, CONH), 10.55 (s, 1H, NH).. 13C NMR in CDCl3  (ppm): 120.6, 123.2, 125.4, 129.5, 137.0, 155.8. ES- mass spectrum, *m/z,* 372 (M-), 486 (M + TFA-), 747 (M--M-). Satisfactory elemental analysis data was obtained.

Compound **4**. 3,4-Dichloro-1*H*-pyrrole-2,5-dicarboxylic acid bis-butylamide: 3,4-Dichloro-1*H*-pyrrole-2,5-dicarboxylic acid diethyl ester (1g, 3.57mmol) was dissolved in methanol (20mL) and butylamine (36mL, 0.36mol), was added together with a catalytic quantity of NaCN (10mg, 0,2mmol). The red solution was refluxed for 4 days. After removing the solvent under vacuum a red oil was obtained that was purified by column chromatography (dichloromethane/methanol 97/3). Yield: 0.816g (71%). 1H NMR in CDCl3  (ppm): 0.97 (t, *J* = 7.29, 6H, CH3), 1.42 (m, 4H, CH3C*H2*), 1.61 (m, 4H, NCH2C*H2*), 3.47 (m, 4H, NCH2), 6.71 (broad s, 2H, CONH), 10.18 (s, 1H, NH). 13C NMR in CDCl3  (ppm): 13.8, 20.2, 31.6, 39.5, 111.3, 122.6, 158.2. ES+ mass spectrum, *m/z,* 334 (M + H+), 375 (M + H+ + CH3CN), 669 (2M + H+) 691 (2M + Na+), 732 (2M + CH3CN + Na+). Satisfactory elemental analysis data was obtained.

**Fig S1** 1H NMR spectrum of compound **3** in CDCl3

**Fig S2** 13C NMR spectrum of compound **3** in CDCl3

**Fig S3** ES+ MS of compound **3**

**Fig S4** ES- MS of compound **3**

**Figure S5** 1H NMR spectrum of compound **4** in CDCl3

**Figure S6** 13C NMR spectrum of compound **4** in CDCl3

**Figure S7** ES+MS of compound **4**

**Figure S8** NMR titrations with compound **3** in dichloromethane-*d2* with chloride, benzoate and dihydrogenphosphate.

**Figure S9** Dilution study with compound **3** in dichloromethane-*d2*

**Figure S10** NMR titrations of compound **4** in dichloromethane-*d2* with fluoride, chloride, benzoate and dihydrogenphosphate.

**Figure S11** NMR titrations of compound **4** in acetonitrile-*d3* with fluoride, chloride, benzoate and dihydrogenphosphate.
